# Supplementary material for: Vitamin B12 Status Upon Short-Term Intervention with a Vegan Diet—A Randomized Controlled Trial in Healthy Participants
Source: MDPI journal article supplement (doi:10.3390/nu11112815), 2019-11-18
Supplement: s1 [file s1]

Freiburger  
Ernährungsprotokoll

vom:

bis:

Anzahl der Tage:

Tragen Sie für jedes von Ihnen verzehrte Lebensmittel einen Strich in die vorgesehene Spalte ein. Sollt ein Lebensmittel nicht vorhanden sein, so markieren Sie ein ähnliches oder nutzen Sie die freien Zeilen und fügen es handschriftlich dazu.

Bitte beachten Sie die Portionsgröße und machen Sie ggr. mehrere Striche, z.B. für eine große Tasse Kaffee zwei Striche bei "Kaffee kleine Tasse", für 5 Plätzchen fünf Striche bei in der Zeile "Plätzchen Stücke". Beachten Sie, wenn möglich, Mengenangaben auf der Verpackung, ggf. bitte wiegen. Tragen Sie bei einer Mahlzeit alle Lebensmittel einzeln ein, z.B. erhält bei Bratwurst mit Brötchen, Pommes und Cola jedes der vier Lebensmittel einen Strich. Erfassen Sie alle Getränke und alles, was Sie zwischen den Mahlzeiten essen.

Führen sie das Protokoll am besten ständig mit und füllen sie es möglichst an Ort und Stelle aus.

**Abkürzungen:** Bech. = Becher / Port. = Portion / St.= Stück / EL= Eßlöffel / TL= Teelöffel / Sch.= Scheibe

| Lebensmittel | Einheit | Anzahl | Σ |
|--------------|---------|--------|---|
|--------------|---------|--------|---|

Brot

|                  |           |  |  |
|------------------|-----------|--|--|
| Brötchen         | St. 45 g  |  |  |
| Croissant        | St. 50 g  |  |  |
| Graubrot         | Sch. 45 g |  |  |
| Hefezopf         | Sch. 45 g |  |  |
| Knäckebrötchen   | Sch. 10 g |  |  |
| Toastbrot        | Sch. 20 g |  |  |
| Vollkornbrötchen | St. 55 g  |  |  |
| Vollkornbrot     | Sch. 50 g |  |  |
| Weißbrot         | Sch. 35 g |  |  |
| Zwieback         | Sch. 10 g |  |  |
|                  |           |  |  |

Brotbelag

|                              |            |  |  |
|------------------------------|------------|--|--|
| Butter für 1 Scheibe Brot    | TL 5 g     |  |  |
| Margarine für 1 Scheibe Brot | TL 5 g     |  |  |
| Margarine halbfett s. o.     | TL 5 g     |  |  |
| Edelpilzkäse                 | Sch. 30 g  |  |  |
| Frischkäse                   | EL 30 g    |  |  |
| Schmelzkäse                  | Port. 30 g |  |  |
| Schnittkäse 30%F.i.Tr.       | Sch. 30 g  |  |  |
| Schnittkäse 50% F.i.Tr.      | Sch. 30 g  |  |  |
| Weichkäse 45% F.i.Tr.        | Sch. 30 g  |  |  |

|                          |            |  |  |
|--------------------------|------------|--|--|
| Weichkäse 60 % F.i.T.    | Sch. 30 g  |  |  |
| Bierschinken             | Sch. 25 g  |  |  |
| Corned Beef              | Port. 25 g |  |  |
| Fleischwurst             | Sch. 20 g  |  |  |
| Fleischkäse (Aufschnitt) | Sch. 30 g  |  |  |
| Fleischsalat             | Port. 50 g |  |  |
| Leberwurst               | Port. 30 g |  |  |
| Mettwurst                | Port. 30 g |  |  |
| Teewurst                 | Port. 30 g |  |  |
| Salami/Cervelatwurst     | Sch. 20 g  |  |  |
| Schinken roh             | Sch. 15 g  |  |  |
| Schinken gekocht         | Sch. 30 g  |  |  |
| Speck                    | Port. 30 g |  |  |
| Honig                    | EL 20 g    |  |  |
| Konfitüre                | EL20 g     |  |  |
| Nuß-Nougat-Creme         | EL 20 g    |  |  |
| Vegetabler Brotaufstrich | Port. 30 g |  |  |
|                          |            |  |  |

Frühstücksallerlei

|                               |          |  |  |
|-------------------------------|----------|--|--|
| gekochtes Ei                  | St. 55 g |  |  |
| Cornflakes                    | EL4 g    |  |  |
| Cornflakes gezuckert/geröstet | EL 6 g   |  |  |
| Haferflocken                  | EL 10 g  |  |  |
| Müsli                         | EL 15 g  |  |  |
|                               |          |  |  |

Milch / Milchprodukte

|                                       |              |  |  |
|---------------------------------------|--------------|--|--|
| Buttermilch                           | Glas 200 g   |  |  |
| Joghurt natur fettarm (1,5%F.)        | Bech. 150 g  |  |  |
| Joghurt natur vollfett (3,5% F.)      | Becher 150 g |  |  |
| Joghurt mit Frucht fettarm (1,5%F.)   | Bech. 150 g  |  |  |
| Joghurt mit Frucht vollfett (3,5% F.) | Bech. 150 g  |  |  |
| Milch fettarm (1,5% F.)               | GI 200 g     |  |  |
| Milch vollfett (3,5% F.)              | GI 200 g     |  |  |
| Kakao/Trinkschokolade                 | GI 200 g     |  |  |
| Quark Magerstufe                      | EL 20 g      |  |  |
| Quark Halbfettstufe                   | EL20 g       |  |  |
| Sahne (30 % F.)                       | EL 10 g      |  |  |
| Kondensmilch (7,5% F.)                | Port. 12 g   |  |  |
|                                       |              |  |  |

Obst

|                                                           |                           |  |  |
|-----------------------------------------------------------|---------------------------|--|--|
| Brombeere, Erdbeere, Himbeere, Johannisbeere, Heidelbeere | Beerenobst<br>Port. 125 g |  |  |
| Weintraube                                                | Port. 150 g               |  |  |

|                                                     |                              |  |  |
|-----------------------------------------------------|------------------------------|--|--|
| Apfel, Birne, Quitte,...                            | Kernobst<br>Port. 150 g      |  |  |
| Aprikose, Kirsche, Mirabelle, Pflaume, Pfirsich,... | Steinobst<br>Port. 150 g     |  |  |
| Banane                                              | St. 120 g                    |  |  |
| Ananas, Kiwi, Mango, Maracuja,...                   | Südfrüchte<br>Port. 150 g    |  |  |
| Grapefruit, Mandarine, Orange, Zitrone              | Zitrusfrüchte<br>Port. 150 g |  |  |
| Rosinen, Trockenobst                                | Port. 50 g                   |  |  |
|                                                     |                              |  |  |

Sonstiges

|                          |             |  |  |
|--------------------------|-------------|--|--|
| Cornichons, saure Gurken | St. 50 g    |  |  |
| Nüsse                    | Port. 100 g |  |  |
| Oliven                   | Port. 100 g |  |  |
| Erdnüsse gesalzen        | Tasse 100 g |  |  |
| Erdnußflips              | Tasse 50 g  |  |  |
| Chips                    | Tasse 30 g  |  |  |
| Salzstangen              | Port. 30 g  |  |  |
|                          |             |  |  |

Suppen / Eintöpfe

|                    |             |  |  |
|--------------------|-------------|--|--|
| als Vorsuppe       |             |  |  |
| Suppe klar         | Port. 200 g |  |  |
| Suppe gebunden     | Port. 200 g |  |  |
| Cremesuppe         | Port. 200 g |  |  |
| Gulaschsuppe       | Port. 200 g |  |  |
| Nudelsuppe m. Huhn | Port- 200 g |  |  |
| als Hauptgericht   |             |  |  |
| Gemüsesuppe        | Port. 400 g |  |  |
| Kartoffelsuppe     | Port. 400 g |  |  |
| Linseneintopf      | Port. 400 g |  |  |
|                    |             |  |  |

Fleisch / Fisch

|                       |             |  |  |
|-----------------------|-------------|--|--|
| Hackfleisch           | Port. 100 g |  |  |
| Kalbfleisch           | Port. 230 g |  |  |
| Rindfleisch           | Port. 200 g |  |  |
| Schweinefleisch       | Port. 200 g |  |  |
| Innereien             | Port. 170 g |  |  |
| Kotelett              | Port. 170 g |  |  |
| Schnitzel paniert     | Port. 200 g |  |  |
| Würstchen             | Port 100 g  |  |  |
| Brathähnchen (1/2)    | Port. 370 g |  |  |
| Geflügel              | Port. 170 g |  |  |
| Fisch                 | Port. 175 g |  |  |
| Fischfilet paniert    | Port. 200 g |  |  |
| Fischkonserve abgetr. | Port. 65 g  |  |  |

|                                                |                                  |  |  |
|------------------------------------------------|----------------------------------|--|--|
|                                                |                                  |  |  |
| <b>Beilagen</b>                                |                                  |  |  |
| Kartoffeln (Salzkart.)                         | Port. 200 g                      |  |  |
| Pellkartoffeln                                 | Port. 200 g                      |  |  |
| Bratkartoffeln                                 | Port. 200 g                      |  |  |
| Kartoffelbrei                                  | Port. 200 g                      |  |  |
| Kartoffelknödel                                | St. 100 g                        |  |  |
| Kartoffelpuffer                                | St. 75 g                         |  |  |
| Kartoffelsalat                                 | Port. 250 g                      |  |  |
| Pommer Frites                                  | Port. 200 g                      |  |  |
| weißer Reis gekocht                            | Port. 180 g                      |  |  |
| Natur-Reis gekocht                             | Port. 180 g                      |  |  |
| Nudeln eifrei gekocht                          | Port. 180 g                      |  |  |
| Vollkornnudeln gekocht                         | Port 180 g                       |  |  |
| Semmelknödel                                   | St. 100 g                        |  |  |
| Schupfnudeln                                   | Port. 400 g                      |  |  |
| Spätzle, Eiernudeln gekocht                    | Port. 200 g                      |  |  |
|                                                |                                  |  |  |
| <b>Soßen und Fette</b>                         |                                  |  |  |
| Joghurt-Salat-Soße                             | Port. 40 g                       |  |  |
| Essig-Öl-Marinade                              | Port. 20 g                       |  |  |
| Bechamelsonsoße                                | Port. 75 g                       |  |  |
| Grundsoße                                      | Port. 75 g                       |  |  |
| Hackfleischsoße                                | Port. 100 g                      |  |  |
| Jägersoße                                      | Port. 75 g                       |  |  |
| Käsesoße                                       | Port. 75 g                       |  |  |
| Grüne Soße, Kräuterquark                       | Port 200 g                       |  |  |
| Tomatensoße                                    | Port. 75 g                       |  |  |
| Grillsauce                                     | Port. 20 g                       |  |  |
| Tomatenketchup                                 | Port. 20 g                       |  |  |
| Tomatenmark                                    | TL 6 g                           |  |  |
| Senf                                           | TL 6 g                           |  |  |
| Mayonnaise (80% F.)                            | EL 12 g                          |  |  |
| Bratfett                                       | EL 10 g                          |  |  |
| Pflanzenöl                                     | EL 10 g                          |  |  |
|                                                |                                  |  |  |
| <b>Gemüse / Salate</b>                         |                                  |  |  |
| Blattsalat mit Dressing                        | Port. 60 g                       |  |  |
| Rohkostsalat mit Dressing                      | Port. 180 g                      |  |  |
| Bleichsellerie, Mangold, Spinat                | Blattgemüse<br>Port. 200 g       |  |  |
| Grüne Bohnen                                   | Port. 200 g                      |  |  |
| Aubergine, Gurke, Paprika,<br>Tomate, Zucchini | Frucht-<br>gemüse<br>Port. 200 g |  |  |
| Gemüsemais                                     | Port. 200 g                      |  |  |

|                                                                                     |                                                  |  |  |
|-------------------------------------------------------------------------------------|--------------------------------------------------|--|--|
| Blumenkohl, Broccoli, Kohl<br>(Rot-, Grün-, Weiß-), Kohlrabi,<br>Rosenkohl, Wirsing | Kohlgemüse<br>Port. 200 g                        |  |  |
| Sauerkraut                                                                          | Port.150 g                                       |  |  |
| Fenchel, Lauch, Spargel,<br>Zwiebel                                                 | Sprossen-<br>gemüse<br>Port 200 g                |  |  |
| Möhre, Radieschen, Rettich,<br>Rote Bete, Rüben, Sellerie,<br>Schwarzwurzel         | Wurzel- und<br>Knollen-<br>gemüse<br>Port. 200 g |  |  |
| Pilze                                                                               | Port. 120 g                                      |  |  |
|                                                                                     |                                                  |  |  |
| <b>Fertig- und Schnellgerichte</b>                                                  |                                                  |  |  |
| Nudelsalat                                                                          | Port. 250 g                                      |  |  |
| Wurstsalat                                                                          | Port. 250 g                                      |  |  |
| Griechischer Salat                                                                  | Port. 300 g                                      |  |  |
| Italienischer Salat                                                                 | Port. 300 g                                      |  |  |
| Brotwurst ohne Brötchen                                                             | St. 150 g                                        |  |  |
| Currywurst ohne Brötchen                                                            | St. 150 g                                        |  |  |
| Hamburger                                                                           | St. 100 g                                        |  |  |
| Cheeseburger                                                                        | St. 120 g                                        |  |  |
| Big Mac                                                                             | St. 200 g                                        |  |  |
| Maultaschen / Ravioli                                                               | Port 200 g                                       |  |  |
| Pizza                                                                               | St. 400 g                                        |  |  |
| Pfannkuchen                                                                         | Port. 300 g                                      |  |  |
|                                                                                     |                                                  |  |  |
| <b>Hülsenfrüchte</b>                                                                |                                                  |  |  |
| Bohnen                                                                              | Port. 200 g                                      |  |  |
| Erbsen                                                                              | Port. 200 g                                      |  |  |
| Linsen                                                                              | Port. 200 g                                      |  |  |
|                                                                                     |                                                  |  |  |
| <b>Dessert/Kuchen / Süßes</b>                                                       |                                                  |  |  |
| Pudding                                                                             | Port.150 g                                       |  |  |
| Eiscreme                                                                            | Kugel 50 g                                       |  |  |
| Obstkuchen                                                                          | St. 120 g                                        |  |  |
| Cremetorte                                                                          | St. 150 g                                        |  |  |
| Rührkuchen                                                                          | St. 60 g                                         |  |  |
| Platzchen, Kekse                                                                    | St. 10 g                                         |  |  |
| Schokolade                                                                          | Riegel 20 g                                      |  |  |
| Praline                                                                             | St. 10 g                                         |  |  |
| Bonbon, Hartkaramelle                                                               | St. 3 g                                          |  |  |
| Fruchtgummi                                                                         | Port. 50 g                                       |  |  |
| Zucker                                                                              | TL 5 g                                           |  |  |
|                                                                                     |                                                  |  |  |
|                                                                                     |                                                  |  |  |
|                                                                                     |                                                  |  |  |

|                     |                       |  |  |
|---------------------|-----------------------|--|--|
| <b>Getränke</b>     |                       |  |  |
| Kaffee              | kleine Tasse<br>150 g |  |  |
| Tee                 | kleine Tasse<br>150 g |  |  |
| Mineralwasser       | Glas 200 g            |  |  |
| Limonade            | Glas 200 g            |  |  |
| Colagetränke        | Glas 200 g            |  |  |
| Obst- Fruchtsaft    | Glas 200 g            |  |  |
| Obst- Fruchtnektar  | Glas 200 g            |  |  |
| Bier alkohofrei     | Glas 330 g            |  |  |
| Bier                | Glas 330 g            |  |  |
| Weizenbier          | Glas 500 g            |  |  |
| Weißwein            | Glas 200 g            |  |  |
| Rotwein             | Glas 200 g            |  |  |
| Sekt                | Glas 100 g            |  |  |
| Likör               | Glas 40 g             |  |  |
| Schnaps, Branntwein | Glas 20 g             |  |  |

Hier haben Sie noch einmal die Möglichkeit Lebensmittel aufzuschreiben, die auf der Liste nicht aufgeführt sind und die Sie verzehrt haben!

Name:  
Vorname:  
Adresse:  
Tel.Nr./ Fax/Mobil

Ggf. E-Mail:
